# Kidney Function During and After Withdrawal of Long-Term Irbesartan Treatment in Patients With Type 2 Diabetes and Microalbuminuria

STEEN ANDERSEN, MD<sup>1</sup>  
 JENS BRÖCHNER-MORTENSEN, MD, DMSC<sup>2</sup>  
 HANS-HENRIK PARVING, MD, DMSC<sup>1,3</sup>

FOR THE IRBESARTAN IN PATIENTS WITH  
 TYPE 2 DIABETES AND  
 MICROALBUMINURIA STUDY GROUP

**OBJECTIVE** — Irbesartan is renoprotective in patients with type 2 diabetes and microalbuminuria. Whether the observed reduction in microalbuminuria is reversible (hemodynamic) or persistent (glomerular structural/biochemical normalization) after prolonged antihypertensive treatment is unknown. Therefore, the present substudy of the Irbesartan in Patients with Type 2 Diabetes and Microalbuminuria Study (IRMA-2) investigated the reversibility of kidney function changes after withdrawal of 2 years' antihypertensive treatment.

**RESEARCH DESIGN AND METHODS** — The substudy included 133 hypertensive type 2 diabetic patients with persistent microalbuminuria in IRMA-2, randomized to double-masked treatment with either placebo, irbesartan 150 mg, or irbesartan 300 mg o.d. for 2 years. Arterial blood pressure, overnight urinary albumin excretion rate, and glomerular filtration rate (GFR) were determined repeatedly.

**RESULTS** — Baseline characteristics were similar in the placebo, irbesartan 150-mg, and irbesartan 300-mg groups. At the end of the study, mean arterial blood pressure (MABP) was similarly lowered to  $105 \pm 2$  (mean  $\pm$  SE),  $103 \pm 2$ , and  $102 \pm 2$  mmHg, respectively ( $P < 0.05$  versus baseline), and urinary albumin excretion rate reduced by 8% ( $-16$  to  $27$ ) (NS), 34% (95% CI  $8-53$ ), and 60% ( $46-70$ ) ( $P < 0.05$ ). Rates of decline in GFR were  $1.3 \pm 0.7$ ,  $1.2 \pm 0.7$ , and  $1.0 \pm 0.8$  ml  $\cdot$  min<sup>-1</sup>  $\cdot$  1.73 m<sup>-2</sup> per month, respectively, during the initial 3 months of the study and  $0.3 \pm 0.1$ ,  $0.3 \pm 0.1$ , and  $0.4 \pm 0.1$  ml  $\cdot$  min<sup>-1</sup>  $\cdot$  1.73 m<sup>-2</sup> per month in the remaining study period. One month after withdrawal of all antihypertensive medication, MABP remained unchanged in the placebo group,  $105 \pm 2$  mmHg, but increased significantly in the irbesartan groups, to  $109 \pm 2$  and  $108 \pm 2$  mmHg, respectively. Compared with baseline, urinary albumin excretion rate was increased by 14% ( $-17$  to  $54$ ) in the placebo group and by 11% ( $-26$  to  $65$ ) in the irbesartan 150-mg group but was persistently reduced by 47% ( $24-73$ ) in the irbesartan 300-mg group ( $P < 0.05$ ). GFR levels increased to baseline values in the placebo group and approached initial levels in irbesartan groups.

**CONCLUSIONS** — Persistent reduction of microalbuminuria after withdrawal of all antihypertensive treatment suggests that high-dose irbesartan treatment confers long-term renoprotective effects.

*Diabetes Care* 26:3296–3302, 2003

From the <sup>1</sup>Steno Diabetes Center, Gentofte, Denmark; the <sup>2</sup>Department of Clinical Physiology, Aalborg Sygehus, Aalborg, Denmark; and the <sup>3</sup>University of Aarhus, Faculty of Health Science, Aarhus, Denmark.

Address correspondence and reprint requests to Steen Andersen, MD, Steno Diabetes Center, Niels Steensens Vej 2, DK-2820 Gentofte, Denmark. E-mail: stan@dadlnet.dk.

Received for publication 27 June 2003 and accepted in revised form 25 August 2003.

S.A. receives funds from Merck for research to conduct studies on new treatments in diabetic nephropathy. J.B.-M. has received consulting fees from Merck and Sanofi-Synthelabo. H.-H.P. holds stock in Novo Nordisk, has received honoraria for speaking engagements and consultant fees from Merck and Sanofi-Synthelabo, and receives funds from Merck, Astra Corporation, and Sanofi-Synthelabo for research to conduct studies on new treatments in diabetic nephropathy.

**Abbreviations:** ARB, angiotensin II receptor blocker; GFR, glomerular filtration rate; IRMA-2, Irbesartan in Patients with Type 2 Diabetes and Microalbuminuria Study; MABP, mean arterial blood pressure; RAAS, renin-angiotensin-aldosterone system; TGF- $\beta$ , transforming growth factor- $\beta$ .

A table elsewhere in this issue shows conventional and Système International (SI) units and conversion factors for many substances.

© 2003 by the American Diabetes Association.

Several vasoactive hormones exhibit effects on renal hemodynamics, but angiotensin II is the major intrarenal hormone to regulate glomerular filtration rate (GFR) (1). Angiotensin II plays an important role in the initiation and progression of diabetic and nondiabetic glomerulopathies (2,3), but the recognized role of angiotensin II in the pathogenesis of diabetic renal disease cannot be attributed exclusively to its hemodynamic effects (4). Accumulating data suggest that angiotensin II exerts several nonhemodynamic effects, such as growth stimulation, fibrogenesis, and impairment of endothelial function (4).

Studies in type 2 diabetic patients with incipient and overt diabetic nephropathy have demonstrated that angiotensin II receptor blockers (ARBs) are renoprotective in addition to what might be expected from blood pressure reduction alone (5–7). In the Irbesartan in Patients with Type 2 Diabetes and Microalbuminuria Study (IRMA-2), irbesartan 300 mg o.d. significantly reduced the risk of progression to diabetic nephropathy by 70% and lowered microalbuminuria by 38% in hypertensive type 2 diabetic patients (5). Whether the reduction in microalbuminuria is reversible or persistent after prolonged antihypertensive treatment is unknown. Reversibility would suggest a predominantly renal hemodynamic mechanism of ARBs, whereas persistent reduction of microalbuminuria may imply renal improvement of structural damages and/or biochemical abnormalities. The present IRMA-2 substudy aimed to evaluate these mechanisms by investigation of kidney function changes after withdrawal of 2 years' antihypertensive therapy.

## RESEARCH DESIGN AND METHODS

The IRMA-2 study protocol has been described in detail previously (5). In brief, 590 hypertensive type 2 diabetic patients with microalbumin-

Table 1—Baseline characteristics of the patients

|                                                      | Placebo     | Irbesartan  |             |
|------------------------------------------------------|-------------|-------------|-------------|
|                                                      |             | 150 mg o.d. | 300 mg o.d. |
| n                                                    | 48          | 42          | 43          |
| Sex (male/female)                                    | 35/13       | 33/9        | 31/12       |
| Age (years)                                          | 57 ± 9      | 57 ± 9      | 55 ± 9      |
| BMI (kg/m <sup>2</sup> )                             | 31 ± 5      | 30 ± 4      | 30 ± 5      |
| Known diabetes duration (years)                      | 7 ± 6       | 8 ± 6       | 8 ± 7       |
| Systolic blood pressure (mmHg)                       | 154 ± 16    | 153 ± 14    | 153 ± 14    |
| Diastolic blood pressure (mmHg)                      | 91 ± 9      | 90 ± 9      | 92 ± 9      |
| Urinary albumin excretion (μg/min)                   | 46 (21–159) | 60 (19–243) | 51 (21–174) |
| GFR (ml · min <sup>-1</sup> · 1.73 m <sup>-2</sup> ) | 108 ± 28    | 117 ± 20    | 113 ± 23    |
| HbA <sub>1c</sub> (%)                                | 7.1 ± 1.7   | 7.2 ± 1.7   | 7.1 ± 1.7   |
| Serum cholesterol level (mmol/l)                     | 5.7 ± 1.1   | 5.9 ± 1.1   | 5.9 ± 1.1   |
| Serum creatinine level (μmol/l)                      | 97 ± 17     | 97 ± 9      | 97 ± 17     |

Data are means ± SE or median (range). NS between all treatment groups.

uria were included in this multinational, randomized, double-masked, placebo-controlled study of irbesartan (150 and 300 mg o.d.) and were followed for 24 months. The primary outcome was time to onset of diabetic nephropathy, defined as persistent albuminuria in overnight specimens with a urinary albumin excretion rate >200 μg/min and ≥30% increase from baseline level. Target trough blood pressure was <135/85 mmHg 3 months after randomization. Additional antihypertensive treatment used included diuretics, β-blockers, calcium-channel blockers (except dihydropyridines), and α-blockers. These agents were added if target blood pressure was not reached 3 months after randomization.

The present substudy was prespecified in the main study protocol. A total of 11 centers capable of measuring GFR were invited to the substudy. All 133 patients from these 11 centers participated in the substudy (Table 1). Mean arterial blood pressure (MABP), urinary albumin excretion rate, and GFR were measured at baseline, after a single-blind 3-week run-in period, at 3 months, at 24 months, and 1 month after withdrawal of all antihypertensive treatment.

A total of 18 patients in the substudy did not complete 24 months of double-blind treatment for various reasons. In 91 patients who accepted discontinuation of antihypertensive medication, treatment was withdrawn and measurements were repeated after 1 month. During the withdrawal phase, patients were followed by weekly visits in the outpatient clinic and antihypertensive treatment was restarted

if blood pressure exceeded 165/95 mmHg. A total of 15 patients did not complete the 1-month withdrawal phase due to increasing blood pressure >165/95 mmHg or development of peripheral edema (Fig. 1).

Trough office blood pressure (Korotkoff phase IV) was measured using an appropriate cuff with a sphygmomanometer in the sitting position after at least 10 min of rest. Two readings were recorded 2 min apart, and the average value was used for calculation.

The urinary albumin concentration was determined by nephelometry (8).

GFR was measured after a single intravenous injection of 5 MBq <sup>51</sup>Cr-EDTA at 8:00 A.M. by determining the radioactivity in venous blood samples taken 180, 200, 220, and 240 min after the injection, considering sex and body weight of the patient (9–11). The results were standardized for 1.73 m<sup>2</sup> body surface area.

### Statistical analysis

Results are presented as mean ± SD or mean ± SE. One-way ANOVA was used to test for differences between treatment groups. The level of urinary albumin excretion was log-transformed before analysis. Pairwise comparisons were performed using Student's *t* test. A *P* value <0.05 indicated statistical significance. All statistical tests were two sided.

**RESULTS**— Baseline characteristics did not differ between treatment groups. In the placebo, irbesartan 150-mg, and irbesartan 300-mg groups, MABP was similarly lowered from 112 ± 1 (mean ±

SE), 111 ± 1, and 112 ± 2 mmHg to 105 ± 2, 103 ± 2, and 102 ± 2 mmHg, respectively, after 24 months of treatment (*P* < 0.05 vs. baseline). Urinary albumin excretion decreased by 8% (95% CI –16 to 27) (NS), 34% (8–53), and 60% (46–70) in the placebo, irbesartan 150-mg, and irbesartan 300-mg groups, respectively (*P* < 0.05). Rates of decline in GFR were 1.3 ± 0.7, 1.2 ± 0.7, and 1.0 ± 0.8 ml · min<sup>-1</sup> · 1.73 m<sup>-2</sup> per month in the placebo, irbesartan 150-mg, and irbesartan 300-mg groups, respectively, during the initial 3 months of the study. The sustained decreases in GFR were 0.3 ± 0.1, 0.3 ± 0.1, and 0.4 ± 0.1 ml · min<sup>-1</sup> · 1.73 m<sup>-2</sup> per month in the three groups, respectively, during the remaining study period (Fig. 2). One month after withdrawal of all antihypertensive medication, MABP was unchanged in the placebo group, 105 ± 2 mmHg, but increased significantly in the irbesartan groups, to 109 ± 2 and 108 ± 2 mmHg, respectively (*P* < 0.01). Urinary albumin excretion rate increased by 13% (–10 to 42) (NS) in the placebo group, 68% (21–133) (*P* < 0.05) in the irbesartan 150-mg group, and 26% (–14 to 87) (NS) in the irbesartan 300-mg group. Comparing data to baseline levels, urinary albumin excretion rate was insignificantly increased by 14% (–17 to 54) in the placebo group and by 11% (–26 to 65) in the irbesartan 150-mg group but remained persistently reduced by 47% (24–63) in the irbesartan 300-mg group (*P* < 0.05 vs. baseline). The persistent reduction in the irbesartan 300-mg group, as compared with baseline, was highly significantly different from irbesartan 150 mg (*P* < 0.01). GFR levels increased to baseline values, 109 ± 5 ml · min<sup>-1</sup> · 1.73 m<sup>-2</sup>, in the placebo group but only approached initial levels in the irbesartan groups, 107 ± 6 and 108 ± 6 ml · min<sup>-1</sup> · 1.73 m<sup>-2</sup>, respectively.

Hyperfiltration, defined as GFR exceeding normal values + 2 SD (12), was present at baseline in 30% of the investigated patients. Data are analyzed disregarding treatment groups due to limited numbers of patients with hyperfiltration. No significant differences in rate of decrease in GFR between treatment groups were found (data not shown). Mean GFR at baseline in hyperfiltering patients was 139 ± 3 ml · min<sup>-1</sup> · 1.73 m<sup>-2</sup>, compared with 101 ± 2 ml · min<sup>-1</sup> · 1.73 m<sup>-2</sup> in patients with normofiltration (*P* < 0.01).

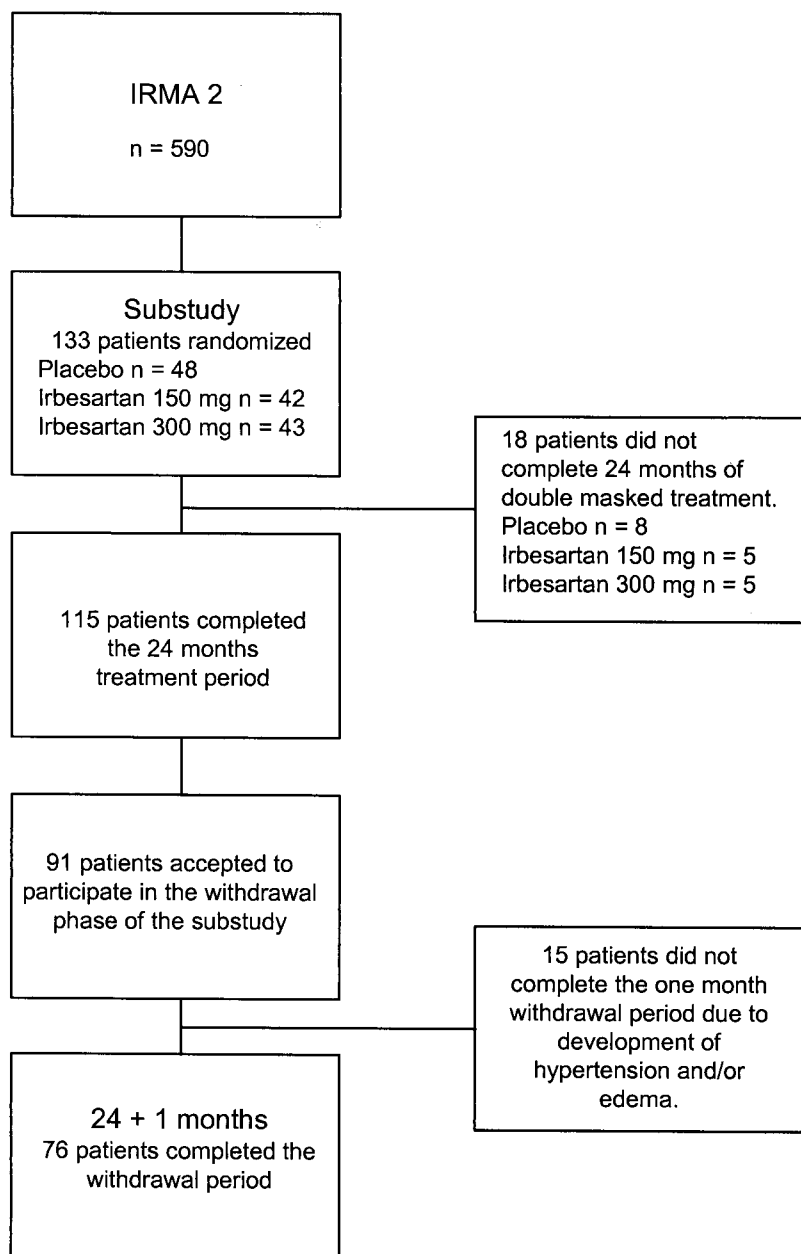

**Figure 1**—Profile of the study.

Rates of decline in GFR were  $3.1 \pm 0.7$  and  $0.3 \pm 0.4 \text{ ml} \cdot \text{min}^{-1} \cdot 1.73 \text{ m}^{-2}$  per month in hyperfiltering and nonhyperfiltering patients, respectively ( $P < 0.01$ ), during the initial 3 months of the study. The sustained decrease in GFR was  $0.6 \pm 0.1$  and  $0.3 \pm 0.1 \text{ ml} \cdot \text{min}^{-1} \cdot 1.73 \text{ m}^{-2}$  per month, respectively, in the remaining study period ( $P = 0.05$ ) (Fig. 3). No significant differences in MABP and urinary albumin excretion rate between the two groups were found. After withdrawal of treatment, GFR increased from  $95 \pm 4$  to

$98 \pm 4 \text{ ml} \cdot \text{min}^{-1} \cdot 1.73 \text{ m}^{-2}$  in normo-filtering patients and  $118 \pm 3$  to  $125 \pm 3 \text{ ml} \cdot \text{min}^{-1} \cdot 1.73 \text{ m}^{-2}$  in hyperfiltering patients (Fig. 3).

At baseline, plasma renin levels were  $22 \pm 2$  (geometric mean  $\pm$  SE),  $21 \pm 2$ , and  $20 \pm 2 \text{ mIU/l}$  in the placebo, irbesartan 150-mg, and irbesartan 300-mg groups, respectively. At the end of the study, levels were unchanged in the placebo group,  $27 \pm 3 \text{ mIU/l}$  (NS), but dose-dependently increased in irbesartan 150- and 300-mg groups, to  $45 \pm 9$  and  $68 \pm 15 \text{ mIU/l}$ , re-

spectively ( $P < 0.05$  vs. baseline). Plasma angiotensin II levels were  $8 \pm 1$ ,  $7 \pm 1$ , and  $8 \pm 1 \text{ pmol/l}$ , respectively, at baseline. At the end of study, angiotensin II levels were unchanged in the placebo group,  $9 \pm 1 \text{ pmol/l}$ , but significantly increased in the irbesartan 150- and 300-mg groups, to  $14 \pm 2$  and  $17 \pm 2 \text{ pmol/l}$ , respectively ( $P < 0.05$  vs. baseline).

Of the 133 patients included in the present substudy, nephropathy developed in 10 patients: 4 patients randomized to placebo and 6 patients in the irbesartan 150-mg group. Considering the group with hyperfiltration, one patient progressed to diabetic nephropathy.

Compliance to study medication was acceptable; by the end of the study, an average of 81% of the irbesartan was taken in the 150-mg group and 89% of the irbesartan was taken in the 300-mg group.

**CONCLUSIONS**— The present 2-year substudy of the IRMA-2 trial demonstrated a highly significant sustained reduction in urinary albumin excretion rate, even after withdrawal of all antihypertensive treatment in the irbesartan 300-mg o.d. group, whereas the irbesartan 150-mg o.d. group returned to baseline. This difference occurred although the regain in MABP and GFR between the two irbesartan groups was nearly identical. Furthermore, a dose-dependent reduction in urinary albumin excretion rate during irbesartan treatment was demonstrated. Finally, the initial rate of decrease in GFR was significantly greater than the sustained decrease in GFR. These differences were particularly prominent, comparing patients with hyperfiltration and normofiltering patients.

Changes in kidney function after withdrawal of long-term antihypertensive treatment has previously been investigated in patients with incipient and overt diabetic nephropathy (13–16). In microalbuminuric diabetic patients, withdrawal of perindopril or nifedipine after 12 months' treatment was associated with an increase in urinary albumin excretion rate to levels exceeding baseline values for both drugs (13). Our group demonstrated a significant increase in urinary albumin excretion rate after cessation of long-term ACE inhibitor therapy in type 1 diabetic patients with microalbuminuria (15). Similarly, in patients with overt diabetic nephropathy, we found significant

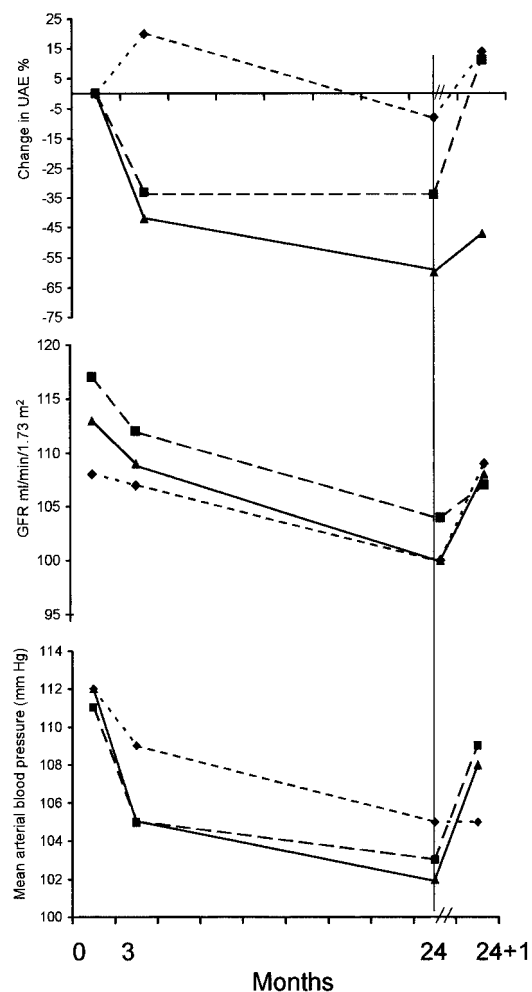

**Figure 2**—Changes in urinary albumin excretion rate in relation to baseline (top), cross-sectional values of GFR (middle), and MABP (bottom) during treatment with placebo (◆), irbesartan 150 mg (■), and irbesartan 300 mg (▲) and 1 month after withdrawal of all antihypertensive treatment.

increases in urinary albumin excretion rate after stopping long-term antihypertensive treatment (14,16). Significant increase in urinary albumin excretion rate suggests that systemic and renal hemodynamic mechanisms are primarily responsible for reduction of urinary albumin excretion in these studies.

Baseline albuminuria predicts the rate of decline in GFR in patients with diabetic and nondiabetic renal disease (17,18). The initial reduction in albuminuria after initiation of antihypertensive treatment is predictive of the long-term efficacy of subsequent renoprotection in patients with diabetic and nondiabetic renal disease (19,20). Finally, residual albuminuria during treatment has been shown to predict rate of decline in GFR (21). Therefore, renoprotective therapy should aim to achieve the maximal antiproteinuric effect in addition to reduction of blood pressure (18).

A number of potential mechanisms may be involved in the reduction of uri-

nary albumin excretion rate during blockade of the renin-angiotensin-aldosterone system (RAAS). RAAS blockade has been

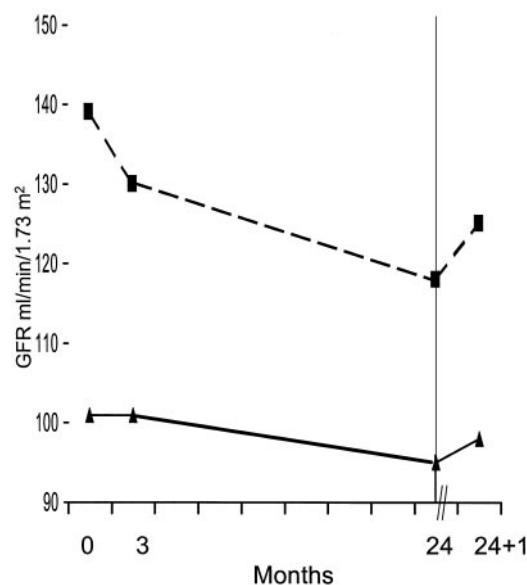

**Figure 3**—Cross-sectional values of GFR in patients with hyperfiltration (■) and normofiltration (▲) and 1 month after withdrawal of all antihypertensive treatment.

suggested to influence glomerular capillary pressure, glomerular size/charge selectivity, podocyte function, and slit diaphragm proteins such as nephrin, as reviewed by Parving et al. (in press, *Seminars of Nephrology*). Animal studies of diabetic renal disease have demonstrated that increased glomerular capillary pressure and proteinuria may be prevented by ACE inhibitor therapy (2). In accordance, studies of patients with type 2 diabetes have shown that estimated glomerular capillary pressure and efferent arteriolar resistance were increased in patients with elevated urinary albumin excretion rate compared with normoalbuminuric patients, but were decreased by ACE inhibitor therapy (22). Size selectivity of the glomerular capillary wall may be abnormal in early diabetic nephropathy but may be partly restored by ARB treatment (23). This may be related to modulation of podocyte function, which contributes significantly to the permeability properties of the glomerulus (24). Slit diaphragm function depends on proteins such as nephrin (25). Animal studies in diabetic renal disease have suggested that ARBs can normalize nephrin expression (26).

Angiotensin II induces structural glomerular abnormalities by stimulation of cytokines and growth factors such as transforming growth factor- $\beta$  (TGF- $\beta$ ). Various in vivo experimental models of renal disease, including diabetes, have demonstrated that blockade of the RAAS decreases the expression of TGF- $\beta$  and

matrix proteins (27–30). Similarly, recent human studies demonstrated that plasma and urinary levels of TGF- $\beta$  were decreased by ARBs (31,32). Furthermore, experimental studies in patients with nondiabetic kidney disease have demonstrated an additional blood pressure-independent reduction in TGF- $\beta$  during high-dose therapy with ARBs and ACE inhibitors (33). This study shows a clear dissociation between the dose required for maximal blood pressure reduction and the optimal dose of ACE inhibitors and ARBs for inhibition of TGF- $\beta$ .

Recent data from kidney biopsy studies demonstrated that 2 years of treatment with ACE inhibitors in type 2 diabetic patients with nephropathy improved renal structural abnormalities and was correlated with reduction in proteinuria (34). Similarly, in young type 1 diabetic patients with microalbuminuria, less progression of early glomerulopathy was seen in patients treated with either ACE inhibitors or  $\beta$ -blockers compared with placebo (35). The results from our study may suggest reversal of structural and/or biochemical abnormalities in the glomerular apparatus. However, the exact mechanism involved can only be determined by kidney biopsy studies evaluating the above-mentioned phenomenon quantitatively.

Previous studies in type 1 diabetic patients with diabetic nephropathy suggested that the initial decrease in GFR is reversible and due to functional, hemodynamic effects of antihypertensive treatment (16). In contrast, studies in hypertensive type 2 diabetic patients with diabetic nephropathy indicated that the initial steep decrease in GFR is due to an at least partly irreversible effect of antihypertensive treatment (14). In the present study, the initial decrease in GFR was mainly observed in hyperfiltering patients and regained after withdrawal of treatment and, thus, was related to hemodynamic effects of antihypertensive treatment. Furthermore, hyperfiltering patients were characterized by significantly higher sustained rates of decline in GFR compared with normofiltering patients. Elevated sustained rate decline in GFR in the observation period excludes the possibility of a “regression toward the mean phenomenon.” Hyperfiltration has primarily been investigated in type 1 diabetes. Longitudinal studies of hyperfiltration as a putative risk factor for development of diabetic nephropathy in

normoalbuminuric or microalbuminuric type 1 diabetic patients have reached conflicting results (36–40). Hyperfiltration may, for a period, be associated with elevated rates of decrease in GFR (41), whereas long-term follow-up has found that hyperfiltration does not predict long-term renal outcome (39). In type 2 diabetes, a cross-sectional study in microalbuminuric patients (42) found an incidence of hyperfiltration of 37% in accordance with the present data, but longitudinal studies in type 2 diabetes are not available. Therefore, whether hyperfiltration is a risk factor for development of diabetic nephropathy in type 2 diabetes or a short-term transient phase is unknown. The present data do not indicate a higher risk of progression of diabetic renal disease in hyperfiltering patients, because diabetic nephropathy developed in only one patient in this group.

Antihypertensive medications have been withdrawn in several previous and recent trials in hypertensive diabetic patients, typically in a 1-month wash-out period or placebo run-in phase before the study to assess baseline values (43–46). Similarly, IRMA-2 was preceded by a 4-week wash-out period of previous antihypertensive medication (5). Withdrawal of antihypertensive treatment for 1 month is justified and essential to compare effects of different drugs before and/or after treatment, provided appropriate safety procedures are applied, as in our study.

The present substudy supports the conclusion from the main IRMA-2 study, that irbesartan 300 mg is superior to irbesartan 150 mg for renoprotection. Low-dose irbesartan treatment may be insufficient for renoprotection because of incomplete blockade of the RAAS, as indicated by the dose-dependent increase in plasma renin concentration. However, dose-titration studies of maximal antialbuminuric dose have not been performed; therefore, doses >300 mg may even be more effective.

In summary, the present substudy of the IRMA-2 trial investigated kidney function during and after withdrawal of long-term antihypertensive treatment. Persistent reduction of microalbuminuria after withdrawal of all antihypertensive treatment suggests that high-dose irbesartan therapy confers long-term renoprotective effects that may reflect reversal of renal structural and/or biochemical abnormalities.

**Acknowledgments**— This study was supported by a grant from Sanofi-Synthelabo and Bristol-Myers Squibb.

The following individuals participated in the Irbesartan in Patients with Type 2 Diabetes and Microalbuminuria Study (IRMA-2).

Scientific Committee members: Peter Arner, Prof., MD (Chairman); Hans-Henrik Parving, Prof., MD; Jens Bröchner-Mortensen, MD; Ramon Gomis, Prof., MD; Hendrik Lehnert, Prof., MD; Gérald Frangin, MD; and Magali Grégoire, Biochemist.

Data and Safety Monitoring Committee members: Jean-Pierre Boissel, Prof., MD (Chairman); W. Kiowski, Prof., MD; and Louis Monnier, Prof., MD.

The following individuals participated in the Irbesartan GFR substudy.

Argentina: L.I. Juncos, C. Ferrer, Córdoba; Australia: P. Phillips, J. CheeHong Goh, P. Hoadley, A. Smith, Woodville South; Canada: A. Belanger, R. Dumas, N. Kandalaf, Laval PQ; Denmark: H.-H. Parving, S. Andersen, P. Christensen, P. Hovind, H.P. Hansen, Gentofte; K. Kølendorf, Køge; France: H. Affres, A. Prigent, Dr. Yvart, Le Kremlin-Bicêtre; Greece: E. Diamantopoulos, E. Andreadis, M. Kakou, Athens; Croatia: V. Profozic, I. Nazar, G. Roglic, M. Radman, M. Stenzel, J. Vukovic, Zagreb; Italy: F. Quarello, R. Boero, V. Alfieri, A. Pignataro, Torino; South Africa: L. Distiller, B. Kramer, Johannesburg; U.K.: R.L. Kennedy, J. Bell, Sunderland.

## References

- Blantz RC, Gabbai FB: Effect of angiotensin II on glomerular hemodynamics and ultrafiltration coefficient. *Kidney Int Suppl* 20:S108–S111, 1987
- Zatz R, Dunn BR, Meyer TW, Anderson S, Rennke HG, Brenner BM: Prevention of diabetic glomerulopathy by pharmacological amelioration of glomerular capillary hypertension. *J Clin Invest* 77:1925–1930, 1986
- Anderson S, Meyer TW, Rennke HG, Brenner BM: Control of glomerular hypertension limits glomerular injury in rats with reduced renal mass. *J Clin Invest* 76:612–619, 1985
- Wolf G, Ziyadeh FN: The role of angiotensin II in diabetic nephropathy: emphasis on nonhemodynamic mechanisms. *Am J Kidney Dis* 29:153–163, 1997
- Parving HH, Lehnert H, Brochner-Mortensen J, Gomis R, Andersen S, Arner P: The effect of irbesartan on the development of diabetic nephropathy in patients with type 2 diabetes. *N Engl J Med* 345:870–878, 2001
- Brenner BM, Cooper ME, de Zeeuw D, Keane WF, Mitch WE, Parving HH, Remuzzi G, Snapinn SM, Zhang Z, Shahinfar S: Effects of losartan on renal and cardio-

- vascular outcomes in patients with type 2 diabetes and nephropathy. *N Engl J Med* 345:861–869, 2001
7. Lewis EJ, Hunsicker LG, Clarke WR, Berl T, Pohl MA, Lewis JB, Ritz E, Atkins RC, Rohde R, Raz I: Renoprotective effect of the angiotensin-receptor antagonist irbesartan in patients with nephropathy due to type 2 diabetes. *N Engl J Med* 345:851–860, 2001
  8. Hofmann W, Guder W: Preanalytical and analytical factors involved in the determination of urinary immunoglobulin G, albumin, alpha1-microglobulin and retinol binding protein using the Behring nephelometer. *Lab Med* 13:470–478, 1989
  9. Bröchner-Mortensen J, Rødbro P: Selection of routine method for determination of glomerular filtration rate in adult patients. *Scand J Clin Lab Invest* 36:35–45, 1976
  10. Bröchner-Mortensen J: A simple method for the determination of glomerular filtration rate. *Scand J Clin Lab Invest* 30:271–274, 1972
  11. Bröchner-Mortensen J: The extracellular fluid volume in normal man determined as the distribution volume of (<sup>51</sup>Cr)EDTA. *Scand J Clin Lab Invest* 42:261–264, 1982
  12. Stöckel M: Kompensatorisk renal hyperfunktion. In *Lægeforeningens Forlag*. 1991, p. 1–53
  13. Melbourne Diabetic Nephropathy Study Group: Comparison between perindopril and nifedipine in hypertensive and normotensive diabetic patients with microalbuminuria. *BMJ* 302:210–216, 1991
  14. Hansen HP, Nielsen FS, Rossing P, Jacobsen P, Jensen BR, Parving H-H: Kidney function after withdrawal of long-term antihypertensive treatment in diabetic nephropathy. *Kidney Int* 52:S49–S53, 1997
  15. Mathiesen ER, Hommel E, Hansen HP, Smidt UM, Parving H-H: Randomised controlled trial of long term efficacy of captopril on preservation of kidney function in normotensive patients with insulin dependent diabetes and microalbuminuria. *BMJ* 319:24–25, 1999
  16. Hansen HP, Rossing P, Tarnow L, Nielsen FS, Jensen BR, Parving H-H: Increased glomerular filtration rate after withdrawal of long-term antihypertensive treatment in diabetic nephropathy. *Kidney Int* 47:1726–1731, 1995
  17. Rossing P: Promotion, prediction and prevention of progression of nephropathy in type 1 diabetes mellitus. *Diabet Med* 15:900–919, 1998
  18. de Jong PE, Navis GJ, de Zeeuw D: Renoprotective therapy: titration against urinary protein excretion. *Lancet* 354:352–353, 1999
  19. Rossing P, Hommel E, Smidt UM, Parving H-H: Reduction in albuminuria predicts diminished progression in diabetic nephropathy. *Kidney Int* 45 (Suppl. 45): S145–S149, 1994
  20. Apperloo AJ, de Zeeuw D, de Jong PE: Short-term antiproteinuric response to antihypertensive treatment predicts long-term GFR decline in patients with non-diabetic renal disease. *Kidney Int* 45 (Suppl. 45):S174–S178, 1994
  21. Hovind P, Rossing P, Tarnow L, Smidt UM, Parving HH: Progression of diabetic nephropathy. *Kidney Int* 59:702–709, 2001
  22. Imanishi M, Yoshioka K, Konishi Y, Okumura M, Okada N, Sato T, Tanaka S, Fujii S, Kimura G: Glomerular hypertension as one cause of albuminuria in type II diabetic patients. *Diabetologia* 42:999–1005, 1999
  23. Andersen S, Blouch K, Bialek J, Deckert M, Parving HH, Myers BD: Glomerular permselectivity in early stages of overt diabetic nephropathy. *Kidney Int* 58:2129–2137, 2000
  24. Daniels BS: The role of the glomerular epithelial cell in the maintenance of the glomerular filtration barrier. *Am J Nephrol* 13:318–323, 1993
  25. Deen WM, Lazzara MJ, Myers BD: Structural determinants of glomerular permeability. *Am J Physiol Renal Physiol* 281: F579–F596, 2001
  26. Bonnet F, Cooper ME, Kawachi H, Allen TJ, Boner G, Cao Z: Irbesartan normalises the deficiency in glomerular nephrin expression in a model of diabetes and hypertension. *Diabetologia* 44:874–877, 2001
  27. Kelly DJ, Skinner SL, Gilbert RE, Cox AJ, Cooper ME, Wilkinson-Berka JL: Effects of endothelin or angiotensin II receptor blockade on diabetes in the transgenic (mRen-2)27 rat. *Kidney Int* 57:1882–1894, 2000
  28. Hill C, Logan A, Smith C, Gronbaek H, Flyvbjerg A: Angiotensin converting enzyme inhibitor suppresses glomerular transforming growth factor beta receptor expression in experimental diabetes in rats. *Diabetologia* 44:495–500, 2001
  29. Taal MW, Chertow GM, Rennke HG, Gurnani A, Jiang T, Shahsafaei A, Troy JL, Brenner BM, Mackenzie HS: Mechanisms underlying renoprotection during renin-angiotensin system blockade. *Am J Physiol Renal Physiol* 280:F343–F355, 2001
  30. McLennan SV, Kelly DJ, Cox AJ, Cao Z, Lyons JG, Yue DK, Gilbert RE: Decreased matrix degradation in diabetic nephropathy: effects of ACE inhibition on the expression and activities of matrix metalloproteinases. *Diabetologia* 45:268–275, 2002
  31. Esmatjes E, Flores L, Inigo P, Lario S, Ruilope LM, Campistol JM: Effect of losartan on TGF-beta1 and urinary albumin excretion in patients with type 2 diabetes mellitus and microalbuminuria. *Nephrol Dial Transplant* 16 (Suppl. 1):90–93, 2001
  32. Houlihan CA, Akdeniz A, Tsalamandris C, Cooper ME, Jerums G, Gilbert RE: Urinary transforming growth factor-β excretion in patients with hypertension, type 2 diabetes, and elevated albumin excretion rate: effects of angiotensin receptor blockade and sodium restriction. *Diabetes Care* 25:1072–1077, 2002
  33. Peters H, Border WA, Noble NA: Targeting TGF overexpression in renal disease: maximizing the antifibrotic action of angiotensin II blockade. *Kidney Int* 54:1570–1580, 1998
  34. Cordonnier DJ, Pinel N, Barro C, Maynard C, Zaoui P, Halimi S, Hurault de Ligny B, Reznic Y, Simon D, Bilous RW: Expansion of cortical interstitium is limited by converting enzyme inhibition in type 2 diabetic patients with glomerulosclerosis. *J Am Soc Nephrol* 10:1253–1263, 1999
  35. Rudberg S, Osterby R, Bangstad HJ, Dahlquist G, Persson B: Effect of angiotensin converting enzyme inhibitor or beta blocker on glomerular structural changes in young microalbuminuric patients with type I (insulin-dependent) diabetes mellitus. *Diabetologia* 42:589–595, 1999
  36. Lervang H-H, Jensen S, Bröchner-Mortensen J, Ditzel J: Early glomerular hyperfiltration and the development of late nephropathy in type 1 (insulin-dependent) diabetes mellitus. *Diabetologia* 31:723–729, 1988
  37. Mogensen CE: Early glomerular hyperfiltration in insulin-dependent diabetics and late nephropathy. *Scand J Clin Lab Invest* 46:201–206, 1986
  38. Rudberg S, Persson B, Dahlquist G: Increased glomerular filtration rate as a predictor of diabetic nephropathy: an 8-year prospective study. *Kidney Int* 41:822–828, 1992
  39. Yip J, Jones SL, Wiseman MJ, Hill C, Viberti G: Glomerular hyperfiltration in prediction of nephropathy in IDDM. *Diabetes* 45:1729–1733, 1996
  40. Lervang H-H, Jensen S, Bröchner-Mortensen J, Ditzel J: Does increased glomerular filtration rate or disturbed tubular function early in the course of childhood type 1 diabetes predict the development of nephropathy? *Diabet Med* 9:635–640, 1992
  41. Jones SL, Wiseman MJ, Viberti GC: Glomerular hyperfiltration as a risk factor for diabetic nephropathy: five year report of a prospective study. *Diabetologia* 34:59–60, 1991
  42. Vedel P, Obel J, Nielsen FS, Bang LE, Svendsen TL, Pedersen OB, Parving H-H: Glomerular hyperfiltration in microalbuminuric NIDDM patients. *Diabetologia* 39:1584–1589, 1996

43. Agardh CD, Garcia-Puig J, Charbonnel B, Angelkort B, Barnett AH: Greater reduction of urinary albumin excretion in hypertensive type II diabetic patients with incipient nephropathy by lisinopril than by nifedipine. *J Hum Hypertens* 10:185–192, 1996
44. Lacourciere Y, Nadeau A, Poirier L, Tancrede G: Captopril or conventional therapy in hypertensive type II diabetics: three-year analysis. *Hypertension* 21:786–794, 1993
45. Estacio RO, Jeffers BW, Gifford N, Schrier RW: Effect of blood pressure control on diabetic microvascular complications in patients with hypertension and type 2 diabetes. *Diabetes Care* 23:B54–B64, 2000
46. Fogari R, Zoppi A, Corradi L, Mugellini A, Lazzari P, Preti P, Lusardi P: Long-term effects of ramipril and nitrendipine on albuminuria in hypertensive patients with type II diabetes and impaired renal function. *J Hum Hypertens* 13:47–53, 1999
